# Supplementary material for: Emulsification by vitamin E TPGS or Quillaja extract enhanced absorption of berberine without affecting its metabolism in humans
Source: Royal Society of Chemistry journal article supplement (doi:10.1039/d2fo02288e), 2022-01-01
Supplement: d2fo02288e1.pdf [file d2fo02288e1.pdf]

## Supplemental Tables

**Table S1.** AUC<sub>0-12h</sub>, C<sub>max</sub>, t<sub>1/2</sub>, T<sub>max</sub>, of free berberine, berberrubine, and demethylberberine in plasma after participants taking berberine powder, TPGS emulsified, and Quillaja extract emulsified berberine.

| Pharmacokinetic parameters                            | Berberine powder |           | TPGS emulsified |          | Quillaja Extract emulsified |            |
|-------------------------------------------------------|------------------|-----------|-----------------|----------|-----------------------------|------------|
|                                                       | Male             | Female    | Male            | Female   | Male                        | Female     |
| Free berberine                                        |                  |           |                 |          |                             |            |
| AUC <sub>0-12h</sub> (nM·hr)                          | 7.3±2.3          | 5.8±1.6   | 11.1±3.1        | 14.8±4   | 26.4±12.6                   | 30.3±10.8  |
| C <sub>max</sub> (nM)                                 | 1.0±0.3          | 0.7±0.2   | 2.0±0.6         | 2.0±0.5  | 4.9±2.4                     | 5.4±2.3    |
| t <sub>1/2</sub> (hr)                                 | 4.1±1.6          | 22.6±5.9  | 4.3±0.7         | 6.9±4.1  | 4.6±0.4                     | 4.8±1.9    |
| T <sub>max</sub> (hr)                                 | 5.7±1.5          | 4.0±0.9   | 3.9±0.7         | 5.6±0.7  | 3.9±0.6                     | 4.2±1.3    |
| Free berberrubine                                     |                  |           |                 |          |                             |            |
| AUC <sub>0-12h</sub> (nM·hr)                          | 13.0±2.6         | 12.6±0.9  | 22.6±3.7        | 27.4±6   | 41.3±13.8                   | 40.9±11.2  |
| C <sub>max</sub> (nM)                                 | 1.6±0.4          | 1.4±0.1   | 3.1±0.5         | 3.6±0.7  | 7.8±3.0                     | 5.7±1.5    |
| t <sub>1/2</sub> (hr)                                 | 17.7±11.7        | 36.5±14.4 | 8.8±4.4         | 4.1±1.1  | 3.9±0.5                     | 4.7±0.5    |
| T <sub>max</sub> (hr)                                 | 4.9±0.9          | 3.2±0.8   | 6.0±0.4         | 4.4±1.2  | 4.1±0.6                     | 3.6±0.4    |
| Free demethylberberine                                |                  |           |                 |          |                             |            |
| AUC <sub>0-12h</sub> (nM·hr)                          | 37.2±9.3         | 28.4±13.6 | 55.3±24.4       | 50.8±6.8 | 74.5±14.7                   | 112.8±42.1 |
| C <sub>max</sub> (nM)                                 | 5.0±1.1          | 3.8±1.8   | 9.1±3.9         | 11.7±5.1 | 14.2±3.1                    | 17.0±5.6   |
| t <sub>1/2</sub> (hr)                                 | 7.4±1.5          | 8.1±1.1   | 5.7±1.3         | 3.7±1.3  | 3.0±0.3                     | 2.8±0.8    |
| T <sub>max</sub> (hr)                                 | 4.1±0.5          | 4.6±0.6   | 4.3±0.7         | 4.8±1.0  | 4.6±0.5                     | 4.8±1.0    |
| Berberubine/<br>Berberine AUC <sub>0-12h</sub>        | 2.8±0.8          | 2.7±0.6   | 2.7±0.4         | 2.0±0.2  | 2.0±0.3                     | 1.7±0.4    |
| Demethylberberine<br>/ Berberine AUC <sub>0-12h</sub> | 8.7±3.4          | 5.5±2.4   | 6.8±4.1         | 6.1±3.0  | 5.6±1.8                     | 4.8±1.4    |

Pharmacokinetic parameters were calculated using non-compartmental model. Data are expressed as mean ± SEM (n=7 for male, n=5 for female). Means between genders were compared using Tukey HSD. No gender differences were identified amount participants taking the same berberine formulation.

**Table S2.** AUC<sub>0-12</sub>, C<sub>max</sub>, t<sub>1/2</sub>, t<sub>max</sub>, of total berberrubine and total demethylberberine in plasma after participants taking berberine powder, TPGS emulsified, and Quillaja extract emulsified berberine.

| Pharmacokinetic parameters   | Berberine powder        |            | TPGS emulsified |             | Quillaja Extract emulsified |             |
|------------------------------|-------------------------|------------|-----------------|-------------|-----------------------------|-------------|
|                              | Male                    | Female     | Male            | Female      | Male                        | Female      |
|                              | Total berberrubine      |            |                 |             |                             |             |
| AUC <sub>0-12h</sub> (nM·hr) | 178.5±41.1              | 177.9±25.8 | 321.1±110.7     | 411.1±111.4 | 346.6±78.7                  | 709.8±243.  |
| C <sub>max</sub> (nM)        | 20.9±4.9                | 18.7±3.0   | 40.3±13.7       | 54.5±16.9   | 54.0±14.1                   | 91.7±31.9   |
| t <sub>1/2</sub> (hr)        | 16.2±12.8               | 63.5±29.4  | 16.4±5.5        | 6.2±0.8     | 4.3±0.4                     | 5.1±0.7     |
| T <sub>max</sub> (hr)        | 7.6±1.0                 | 5.4±2.0    | 5.7±0.5         | 6.4±0.7     | 4.9±0.6                     | 5.6±0.4     |
|                              | Total demethylberberine |            |                 |             |                             |             |
| AUC <sub>0-12h</sub> (nM·hr) | 114.0±21.8              | 96.0±8.0   | 119.9±20.3      | 139.2±16.1  | 252.8±42.8                  | 547.1±183.3 |
| C <sub>max</sub> (nM)        | 14.0±3.2                | 11.9±1.8   | 17.5±4.1        | 17.5±2.6    | 42.5±8.7                    | 77.7±25.5   |
| t <sub>1/2</sub> (hr)        | 31.4±11.7               | 23.7±7.5   | 13.3±3.7        | 11.5±3.5    | 4.1±0.4                     | 5.0±0.8     |
| T <sub>max</sub> (hr)        | 5.4±0.8                 | 4.0±0.5    | 5.0±0.4         | 5.0±0.9     | 4.6±0.5                     | 5.2±1.0     |

Pharmacokinetic parameters were calculated using non-compartmental model. Data are expressed as mean ± SEM (n=7 for male, n=5 for female). Means between genders were compared using Tukey HSD. No gender differences were identified amount participants taking the same berberine formulation.

**Table S3.** Pharmacokinetic parameters ( $C_{max}$ ,  $t_{1/2}$ ,  $t_{max}$ ,  $AUC_{0-12}$ ) of berberrubine conjugates and demethylberberine conjugates in plasma after participants taking berberine powder, TPGS emulsified, and Quillaja extract emulsified berberine.

| Pharmacokinetic parameters                             | Berberine powder |                       | TPGS emulsified |             | Quillaja Extract emulsified |             |
|--------------------------------------------------------|------------------|-----------------------|-----------------|-------------|-----------------------------|-------------|
|                                                        | Male             | Female                | Male            | Female      | Male                        | Female      |
| Berberrubine conjugates (glucuronides + sulfates)      |                  |                       |                 |             |                             |             |
| $AUC_{0-12h}$ (nM·hr)                                  | 165.5±39.7       | 165.4±26.6            | 299.2±125.4     | 383.7±114.1 | 305.4±69.1                  | 669.0±237.8 |
| $C_{max}$ (nM)                                         | 19.5±4.7         | 17.4±3.0              | 37.4±15.6       | 51.7±17     | 46.3±11.8                   | 87±31.2     |
| $t_{1/2}$ (hr)                                         | 14.9±11.4        | 7.3± 0.0              | 18.0±6.9        | 5.6±1.0     | 4.5±0.5                     | 5.5±0.7     |
| $T_{max}$ (hr)                                         | 7.6±1.0          | 6.0±1.9               | 5.7±0.5         | 6.8±0.8     | 4.9±0.6                     | 6.0±0.6     |
| Conjugates/total % at 6 hrs                            | 91.3±1.2         | 91.8±1.8              | 87.3±3.1        | 90.9±3.4    | 87.5±2.8                    | 94.3±1.4    |
| Demethylberberine conjugates (glucuronides + sulfates) |                  |                       |                 |             |                             |             |
| $AUC_{0-12h}$ (nM·hr)                                  | 76.8±16.7        | 58.4±7.4              | 66.8±15         | 103.1±17.9  | 178.3±29.9                  | 431.9±142.2 |
| $C_{max}$ (nM)                                         | 9.7±2.5          | 6.8±0.5               | 8.6±2.6         | 13.2±2.6    | 28.4±6.0                    | 61.2±20.0   |
| $t_{1/2}$ (hr)                                         | 3.2±0.2          | 1.0 <del>x</del> ±0.8 | 18.7±8.1        | 21.8±11     | 4.8±0.4                     | 5.4±1.0     |
| $T_{max}$ (hr)                                         | 4.7±1.2          | 3.4±0.8               | 5.6±0.6         | 5.4±1.1     | 4.7±0.5                     | 5.0±1.1     |
| Conjugates/Total % at 6 hrs                            | 66.1±6.9         | 50.9±17.5             | 61.7±11.0       | 60.3±16.6   | 72.5±3.4                    | 81.7±3.1    |

Pharmacokinetic parameters were calculated using non-compartmental model. Data are expressed as mean ± SEM (n=7 for male, n=5 for female). Means between genders were compared using Tukey HSD. No gender differences were identified amount participants taking the same berberine formulation.
